## Review Article

# Modulating skin colour: role of the thioredoxin and glutathione systems in regulating melanogenesis

Yaoying Lu<sup>1,2</sup>, Kathryn F. Tonissen<sup>1,2</sup> and  Giovanna Di Trapani<sup>1</sup><sup>1</sup>School of Environment and Science, Griffith University, Nathan, QLD 4111, Australia; <sup>2</sup>Griffith Institute for Drug Discovery, Griffith University, Nathan, QLD 4111, Australia**Correspondence:** Kathryn F. Tonissen (k.tonissen@griffith.edu.au) or Giovanna Di Trapani (g.ditrapani@griffith.edu.au)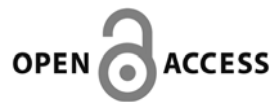

Different skin colour among individuals is determined by the varying amount and types of melanin pigment. Melanin is produced in melanocytes, a type of dendritic cell located in the basal layer of the epidermis, through the process of melanogenesis. Melanogenesis consists of a series of biochemical and enzymatic reactions catalysed by tyrosinase and other tyrosinase-related proteins, leading to the formation of two types of melanin, eumelanin and pheomelanin. Melanogenesis can be regulated intrinsically by several signalling pathways, including the cyclic adenosine monophosphate (cAMP)/protein kinase A (PKA), stem cell factor (SCF)/c-kit and wingless-related integration site (Wnt)/ $\beta$ -catenin signalling pathways. Ultraviolet radiation (UVR) is the major extrinsic factor in the regulation of melanogenesis, through the generation of reactive oxygen species (ROS). Antioxidants or antioxidant systems, with the ability to scavenge ROS, may decrease melanogenesis. This review focuses on the two main cellular antioxidant systems, the thioredoxin (Trx) and glutathione (GSH) systems, and discusses their roles in melanogenesis. In the Trx system, high levels/activities of thioredoxin reductase (TrxR) are correlated with melanin formation. The GSH system is linked with regulating pheomelanin formation. Exogenous addition of GSH has been shown to act as a depigmenting agent, suggesting that other antioxidants may also have the potential to act as depigmenting agents for the treatment of human hyperpigmentation disorders.

## Introduction

The colour of the skin, as well as hair and eyes, is determined by different levels and types of melanin. Melanin is not only responsible for the appearance of the skin but also plays an important photoprotective role in human skin against harmful ultraviolet radiation (UVR) [1,2].

The melanin pigment is produced in melanocytes, a type of dendritic cell located in the basal layer of the epidermis, through the process of melanogenesis [3]. Melanosomes, subcellular lysosome-like organelles in melanocytes, synthesize two types of melanin, the brownish-black eumelanin and the reddish-yellow pheomelanin [4]. The first, and also the rate-limiting step, of melanogenesis for both eumelanin and pheomelanin synthesis is the oxidation of tyrosine to dopaquinone by a copper-containing enzyme called tyrosinase [5]. After melanin synthesis, the mature melanosomes are transported to the neighbouring keratinocytes, which are also located in the epidermis [1]. Melanogenesis is initiated and regulated by a number of signalling pathways and transcription factors. It can also be modulated by some extrinsic factors such as UVR.

The production of melanin in melanocytes induced by UVR generates reactive oxygen species (ROS), which contributes to oxidative damage of DNA [6]. The formation of ROS and oxidative damage and/or the repair of damage produces important signals that stimulate melanogenesis [7–10]. Cellular antioxidant systems, such as the thioredoxin (Trx) and glutathione (GSH) systems, function to reduce oxidative stress [11,12]. Therefore, the antioxidant defence systems play a vital role in maintaining an optimal redox balance in melanocytes by quenching ROS and protecting against oxidative stress, excessive melanogenesis and photo-damaged skin. This review provides an overview of melanin formation, the role of oxidative

Received: 18 February 2021  
Revised: 09 April 2021  
Accepted: 19 April 2021Accepted Manuscript online:  
19 April 2021  
Version of Record published:  
04 May 2021

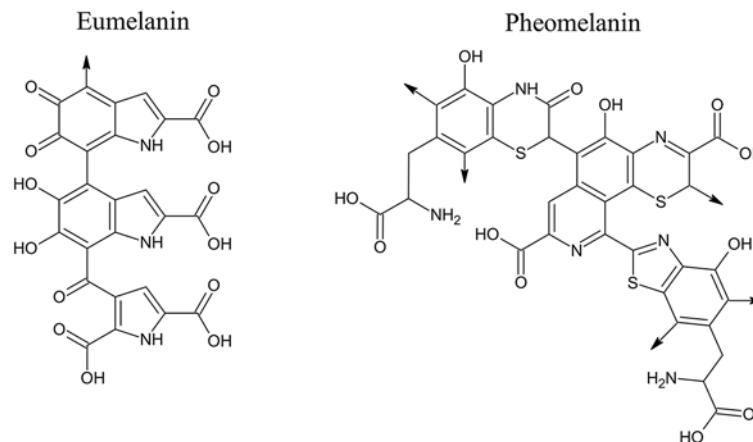

**Figure 1. Chemical structures of eumelanin and pheomelanin**

The structure of eumelanin represents DHICA-melanin, which is a polymeric structure made of DHICA as the basic motif. The positions with  $-\text{COOH}$  group in the eumelanin structure can be substituted by  $-\text{H}$  to represent DHI-melanin. Both DHICA-melanin and DHI-melanin are regarded as eumelanin. The molecular weight of eumelanin shown above is 563.4 g/mol. The structure of pheomelanin consists of polymers composed of benzothiazine and benzothiazole units. The molecular weight of pheomelanin shown above is 806.8 g/mol. The arrows in the structures of eumelanin and pheomelanin indicate sites where polymerization can occur [15,16]. Abbreviations: DHI, 5,6-dihydroxyindole; DHICA, DHI-2-carboxylic acid. This figure is reproduced and used with permission from the publisher [15]. © 2007 The Authors. Journal Compilation. The American Society of Photobiology.

stress in regulating melanogenesis, the involvement of antioxidant systems in melanogenesis and the utility of antioxidants for skin lightening.

## Melanin and melanogenesis

The skin colour is regulated by the production of varying levels of a dark biological pigment called melanin. There are two common types of melanin: the insoluble brownish-black eumelanin and the soluble reddish-yellow pheomelanin (Figure 1). Both eumelanin and pheomelanin are present in the human epidermis [4,13]. It was found that eumelanin is more abundant in darkly pigmented skin compared with light skin. Melanin is not only the primary determinant of skin colour but also protects the skin against the damaging effects of UVR [1,2]. Skin phototypes are categorized into six (I–VI) types by the Fitzpatrick skin type system based on the amount of melanin in the skin and their response to UVR exposure, where type I is very fair skin and always burns and type VI is black colour skin that never/rarely burns [14].

Melanogenesis is a complex multistep process characterized by a series of biochemical reactions (Figure 2). Tyrosinase (TYR), Tyrosinase-related proteins-1 (TRP-1) and TRP-2 (also known as dopachrome tautomerase) are the three important enzymes involved in melanogenesis. The first and also the rate-limiting step of melanogenesis for both eumelanin and pheomelanin is the oxidation of L-tyrosine and/or L-dopa to dopaquinone by a copper-containing enzyme called tyrosinase [5]. Dopaquinone can react with GSH or cysteine to form cysteinyl dopa that produces benzothiazine intermediates, which undergo oxidative polymerization for pheomelanin formation [17,18]. On the other hand, dopaquinone can also undergo intramolecular cyclization followed by an oxidation reaction to produce an orange intermediate, dopachrome [15]. Decarboxylation of dopachrome generates 5,6-dihydroxyindole (DHI), which rapidly oxidizes and polymerizes to form DHI-melanin. In the presence of TRP-2, dopachrome tautomerizes to yield DHI-2-carboxylic acid (DHICA), which then rapidly oxidizes and polymerizes to form DHICA-melanin by TRP-1 [19]. Both DHI-melanin and DHICA-melanin are regarded as eumelanin.

Since melanogenesis is a complex process, various pigmentary disorders occur when it goes awry. Pigmentary disorders are classified into hyperpigmentation, hypopigmentation and mixed pigmentation (hypopigmented and hyperpigmented). Hyperpigmentation is a dermatological condition that occurs when patches of skin are darker than the natural colour of the skin, due to excessive production of melanin, and can result in serious dermatological problems such as ephelides (freckles), solar lentigines, melasma and post-inflammatory hyperpigmentation. Hypopigmentation refers to any form of reduced pigmentation, the most common conditions include vitiligo, albinism and post-inflammatory hypopigmentation [20].

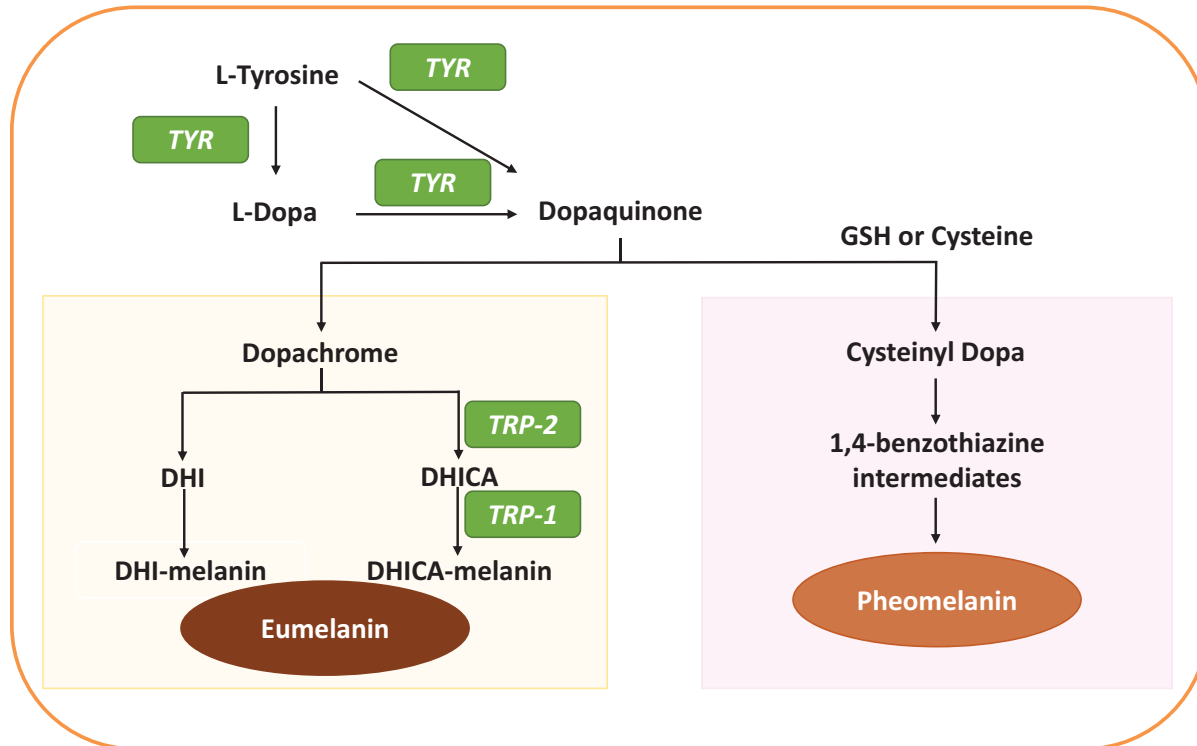

**Figure 2. Melanogenesis formation pathway**

Eumelanin and pheomelanin are produced through a multistep process of biochemical reactions, with the rate-limiting enzyme TYR using L-tyrosine and/or L-dopa as the initial substrates (Abbreviations: DHICA, DHI-2-carboxylic acid; TRP-2, dopachrome tautomerase).

## Regulation of melanogenesis

### Intrinsic regulation of melanogenesis

Skin melanogenesis is modulated by a number of signalling molecules and transcription factors. Melanogenesis-associated transcription factor (MITF) is the most important regulator of melanogenesis, regulating the expression of the melanogenesis-related proteins, such as TYR, TRP-1 and TRP-2 [21]. Moreover, MITF is involved in the regulation of other transcription factors, which control the differentiation [22], proliferation, survival [23] and motility [24] of melanocytes. MITF can be regulated by different signalling pathways, including the cyclic adenosine monophosphate (cAMP)/protein kinase A (PKA) signalling pathway [25], the stem cell factor (SCF)/c-kit mediated signalling pathway [26,27] and the wntless-related integration site (Wnt)/ $\beta$ -catenin signalling pathway [28]. These signalling pathways are activated by the binding of different ligands to their specific melanocyte cell surface receptors (Figure 3).

The cAMP/PKA signalling pathway is activated by the binding of  $\alpha$ -melanocyte-stimulating hormone ( $\alpha$ -MSH) or adrenocorticotrophic hormone (ACTH) to the melanocortin 1 receptor (MC1R). MC1R is a member of the class A family of G protein-coupled receptors [29,30]. The two melanocortin peptides,  $\alpha$ -MSH and ACTH, are the agonists of MC1R and are both derived from the same precursor, called pro-opiomelanocortin (POMC), by proteolytic cleavage [31]. Binding of  $\alpha$ -MSH/ACTH to MC1R activates adenylate cyclase (AC), which catalyses the production of the secondary messenger cAMP [32]. Increasing levels of cAMP activate PKA, which phosphorylates cAMP response element-binding protein (CREB) for further downstream gene expression regulation. Phosphorylated CREBs then induce the expression of MITF, which stimulates the expression of TYR, TRP-1 and TRP-2 to allow melanin synthesis (Figure 3).

The Wnt/ $\beta$ -catenin signalling pathway also contributes to the expression of MITF. The central controller in this pathway is  $\beta$ -catenin, which is the target for the ubiquitin-dependent degradation via phosphorylation by glycogen synthase kinase-3 $\beta$  (GSK3 $\beta$ ) [33]. Binding of Wnt to its receptor Frizzled causes the inactivation of GSK3 $\beta$ , leading

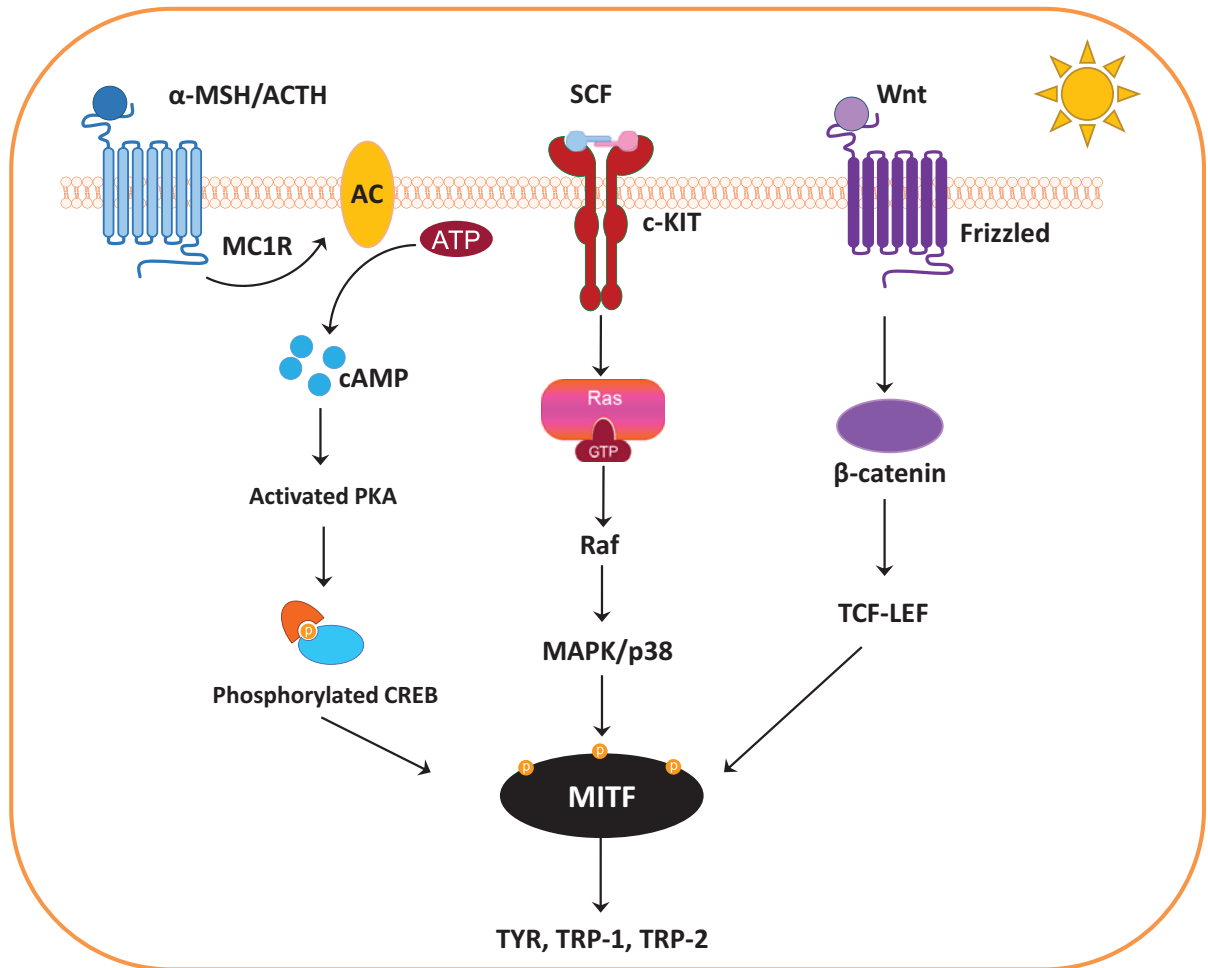

**Figure 3. Melanogenesis signalling pathways**

The central melanogenesis regulator MITF can be regulated by different signalling pathways, including the cAMP/PKA signalling pathway, SCF/c-kit mediated signalling pathway and Wnt/ $\beta$ -catenin signalling pathway (Abbreviations:  $\alpha$ -MSH,  $\alpha$ -melanocyte-stimulating hormone; AC, adenylate cyclase; ACTH, adrenocorticotrophic hormone; ATP, adenosine triphosphate; cKIT, tyrosine-protein kinase kit; CREB, cAMP response element-binding protein; GTP, guanosine-5'-triphosphate; MAPK, mitogen-activated protein kinase; MC1R, melanocortin 1 receptor; TCF-LEF, T-cell factor/lymphoid enhancer-binding factor; TRP-2, dopachrome tautomerase).

to the stabilization and accumulation of cytoplasmic  $\beta$ -catenin [34]. Stabilized  $\beta$ -catenin translocates to nuclei and binds to T-cell factor/lymphoid enhancer-binding factor (TCF-LEF) to induce expression of the MITF gene [35,36].

The SCF/c-kit mediated signalling pathway is activated by the binding of the SCF to the receptor called tyrosine-protein kinase kit (c-kit). This process initiates the mitogen-activated protein kinase (MAPK) cascades for further downstream pathways that regulate melanogenesis. Three major MAPKs are c-JUN N-terminal kinase (JNK), p38 and extracellular signal-regulated kinase (ERK). The phosphorylation of p38 activates MITF expression, which up-regulates melanogenesis-related proteins and stimulates melanin synthesis [37,38]. In contrast, several studies suggested that the activation of ERK and JNK phosphorylates MITF at Ser<sup>73</sup>, which leads to its ubiquitination and degradation, thus subsequently down-regulating melanogenesis (not shown in Figure 3) [26,39–41].

### Extrinsic regulation of melanogenesis

Skin pigmentation can also be modulated by extrinsic factors including UVR. UVR can directly aggravate melanin production by inducing the proliferation and activation of melanocytes and increasing the number of melanosomes in each melanocyte [42,43] as well as the rate of transfer of melanosomes from melanocytes to keratinocytes [44]. On

the other hand, UVR stimulates melanocytes to secrete signal molecules such as  $\alpha$ -MSH, ACTH or other bioactive peptides, inducing the melanogenesis signalling pathway for melanin synthesis [45,46]. As a result, the main melanogenesis regulator MITF is elevated after UVR, followed by an increase in other melanosomal proteins such as TYR, TRP-1 and TRP-2, leading to the stimulation of melanogenesis [47].

## ROS and melanogenesis

### ROS

ROS are chemical reactive species derived from oxygen and include hydrogen peroxide ( $H_2O_2$ ), superoxide ( $O_2^{\bullet-}$ ) and the hydroxyl radical ( $OH\bullet$ ) [48]. It is known that the ROS produced in the skin by UVR are the key contributors to oxidative damage to the skin [49]. Excessive production of ROS causes oxidative stress, resulting in abnormal cellular and physiological functions, causing damage to DNA [50], proteins [51] and lipids [52]. ROS also regulate the synthesis of melanin through a number of mechanisms, as discussed further below.

### ROS and melanogenesis

Melanogenesis is an oxygen-dependent process, which consists of a sequence of oxidation reactions accompanied by the generation of  $O_2^{\bullet-}$  and  $H_2O_2$ . The catalytic activity of tyrosinase in the oxidation of L-Dopa to dopaquinone results in the production of  $O_2^{\bullet-}$  [53]. During the final stages of eumelanogenesis,  $H_2O_2$  generation was associated with the oxidation of the eumelanin precursors DHI and DHICA [54]. Also, elevated levels of ROS and decreased concentrations of intracellular GSH were detected during melanogenesis [55]. This makes melanogenesis a potential source of ROS in pigmented cells, which in turn subjects melanocytes to high levels of oxidative stress. On the other hand, ROS were reported to stimulate/regulate melanogenesis. Low levels of  $H_2O_2$  ( $\leq 0.3$  mM) were found to activate tyrosinase, followed by increased melanin synthesis in human melanocytes [8]. In B16 mouse melanoma cells,  $O_2^{\bullet-}$  was demonstrated to mediate short-term UVR-induced melanogenesis, and this was not associated with the activation of tyrosinase [9]. UVA-mediated ROS production was reported to be the critical cellular signal for melanin production through the intricate interplay with cytosolic and mitochondrial  $Ca^{2+}$  in human melanocytes [10]. Since ROS are considered to play important roles in melanogenesis it stands to reason that, scavengers of ROS, such as antioxidants or antioxidant systems, may reduce hyperpigmentation or decrease melanogenesis.

## Antioxidant systems and melanogenesis

The antioxidant defence systems play a vital role in maintaining an optimal redox balance in melanocytes by quenching ROS, protecting against oxidative stress, excessive melanogenesis and photo-damaged skin. The endogenous antioxidants in melanocytes comprise enzymes, such as superoxide dismutase (SOD), catalase (CAT), glutathione peroxidase (GPx), glutathione reductase (GR) and Trx reductase (TrxR). Non-enzymatic antioxidants include GSH, ascorbic acid (Vitamin C) and  $\alpha$ -tocopherol (Vitamin E) [56].

It was reported that CAT is a major enzymatic antioxidant in melanocytes, and it scavenges  $H_2O_2$ , a by-product of the melanogenic process. A decrease in CAT activity makes lightly pigmented cells less efficient in scavenging ROS and therefore cells are more susceptible to UV damage [57]. SOD, CAT and GPx are the first-line defence antioxidant enzymes [58], and the alterations of their activities have consequences for melanogenesis [59–61]. Vitamin C is widely used as a whitening agent because of its inhibitory effect on melanogenesis. The combined use of Vitamins C and E was also shown to be more effective for the treatment of hyperpigmentation than either vitamin C or E alone [62]. Quevedo also reported that UVR-induced proliferation and melanogenesis of melanocytes were reduced by topical applications of vitamins C and E to the skin of hairless mice [63]. The main cellular antioxidant systems, the Trx and GSH systems, also have reported roles in melanogenesis, which are the main focus of this review.

### The Trx system

The Trx system was first found in *Escherichia coli* [11]. It is one of the major antioxidant systems that can function against oxidative stress and it is present in all species [64,65]. It is composed of Trx, TrxR and nicotinamide adenine dinucleotide phosphate (NADPH) [11]. The Trx system functions through thiol-disulphide interchange reactions, contributing to many essential cellular functions, such as gene expression [66], DNA synthesis [67], signal transduction [68], cell growth and apoptosis [69].

Trx is expressed as three different isoforms: Trx1, Trx2 and SpTrx in mammals, and they are located in the cytoplasm, mitochondria and spermatozoa respectively [70]. This review focuses on cytoplasmic Trx1. Trx1 is a small protein (approx. 12 kDa), which is encoded by the *TXN* gene and functions as a redox protein in many organisms [64]. The highly conserved active site ( $-Cys-Gly-Pro-Cys-$ ), and the two cysteine residues at positions 32 and 35



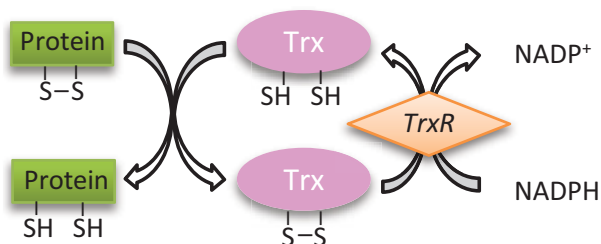

**Figure 4. Mechanism of action of the Trx system**

The active form of Trx has two free thiol groups to catalyse target protein substrate reduction during which a disulphide bond is formed between two cysteine residues. TrxR catalyses the reduction of oxidized Trx using NADPH.

**Table 1 The Trx and GSH systems in melanogenesis**

| Cellular antioxidants                     | Role in the antioxidant systems                                                                                       | Role in melanogenesis                                                                   | References |
|-------------------------------------------|-----------------------------------------------------------------------------------------------------------------------|-----------------------------------------------------------------------------------------|------------|
| <b>Trx (Thioredoxin)</b>                  | Acts as an antioxidant by facilitating the reduction in other proteins through thiol-disulphide interchange reactions | Suppresses melanin synthesis by reacting with the binuclear copper centre of tyrosinase | [11,72]    |
| <b>TrxR (Thioredoxin reductase)</b>       | Catalyses the reduction of oxidized Trx using NADPH                                                                   | High levels/activities of TrxR were correlated with melanin formation                   | [11,73–75] |
| <b>GSH (Glutathione)</b>                  | One of the most abundant thiol antioxidants in cells that protects cells against oxidative stress                     | Involved in pheomelanin formation                                                       | [82–84]    |
| <b>xCT (Cystine/glutamate antiporter)</b> | Provides intracellular cystine for GSH production                                                                     | Acts as a major regulator of the production of pheomelanin by providing cystine         | [90]       |
| <b>GCL (Glutamate cysteine ligase)</b>    | Catalyses the first step in the production of GSH                                                                     | Increased GCL levels were related to the inhibition of UVA-induced melanogenesis        | [93–95]    |
| <b>GR (Glutathione reductase)</b>         | Catalyses the reduction of oxidized glutathione (GSSG) to reduced glutathione (GSH)                                   | High GR activity was associated with pheomelanin formation                              | [99]       |

are responsible for the disulphide reductase activity of Trx1 by reducing disulphide bonds on target proteins to form free thiol groups [11] (Figure 4). The thiol groups of the active site cysteine residues of Trx1 are oxidized to form a disulphide bond [71]. To maintain the appropriate level of reduced Trx1, oxidized Trx1 is reduced by an enzyme called Trx reductase 1 (TrxR1) and the reducing agent NADPH [11] (Figure 4).

## The Trx system and melanogenesis

It has been shown that reduced Trx suppresses melanin synthesis by reacting with the binuclear copper centre of tyrosinase, thus inhibiting tyrosinase activity [72]. TrxR, another component of the Trx system, has also been reported to be involved in melanogenesis. Schallreuter and colleagues found that TrxR levels were induced by X-ray related oxidative stress in response to the presence of ROS in the epidermis. This induction of TrxR was concomitant with melanin production in guinea pig epidermis and Cloudman S91 melanoma cells [73]. It was also reported that TrxR activity correlates with different skin phototypes I–VI (Fitzpatrick skin type system), where darker skin has significantly higher enzyme activity compared with very fair skin [74,75]. In addition, stable knockdown of TrxR1 resulted in a significant decrease in melanin levels and tyrosinase activity in melanocytes [76]. These studies suggested that high levels/activities of TrxR were correlated with melanin formation, providing additional information on the roles of cellular antioxidant proteins in melanogenesis (Table 1).

## The glutathione system

To date, most attention regarding the role of antioxidant systems in melanogenesis has focused on the glutathione system. The glutathione antioxidant system consists of GSH, glutathione disulphide (GSSG), glutamate cysteine ligase (GCL), glutathione synthetase (GSS), GPx, GR and NADPH (Figure 5). GSH is synthesized in two consecutive steps which are catalysed by GCL and GSS respectively. During the first step that is considered rate limiting [77],  $\gamma$ -glutamyl cysteine is produced from L-glutamate and cysteine in the presence of GCL. The second step is catalysed by GSS and involves the condensation of  $\gamma$ -glutamyl cysteine and glycine to form GSH. GSH is a tripeptide ( $\gamma$ -Glu-Cys-Gly) and can exist in either a reduced (GSH) or an oxidized form (GSSG) [78,79]. GPx utilizes GSH as a cofactor to

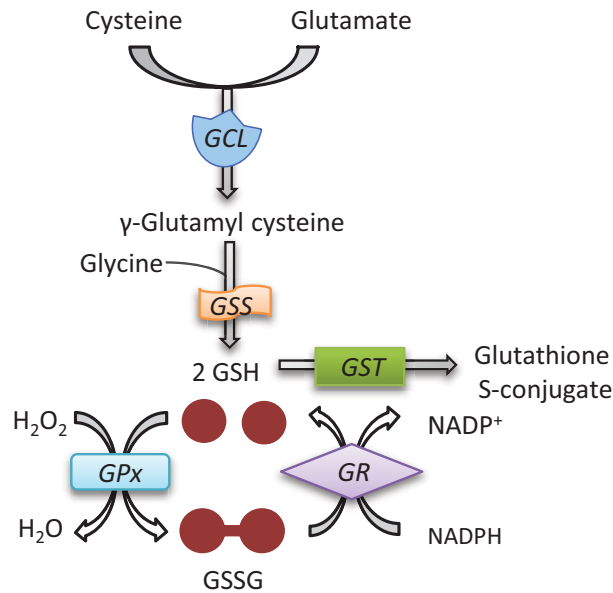

**Figure 5. The glutathione system**

First,  $\gamma$ -glutamyl cysteine is synthesized from L-glutamate and cysteine using GCL. Then, GSS catalyses the condensation of  $\gamma$ -glutamyl cysteine and glycine to form GSH. GSH is used as a cofactor by GPx to reduce  $H_2O_2$ , resulting in the formation of GSSG. GR reduces GSSG to two GSH by NADPH (Abbreviation: GST, glutathione S-transferase).

reduce  $H_2O_2$ , resulting in the formation of GSSG, which in turn can be reduced to GSH by GR using the electron donor NADPH [80,81]. GSH plays an important role in cellular processes such as cell proliferation and apoptosis, and in decreasing oxidative stress caused by ROS. Therefore, maintaining GSH in a reduced state is very important for optimal cell function.

## The glutathione system and melanogenesis

### Glutathione and melanogenesis

It has been shown that GSH not only acts as an antioxidant by scavenging free radicals but is also involved in pheomelanin formation (Figure 2). The involvement of GSH in melanogenesis is mediated by two different mechanisms. First, the direct interaction between GSH and the active site of tyrosinase, resulting in the activation of tyrosinase activity when the concentrations of GSH is below 3 mM and inhibition at higher GSH concentrations [82]. Second, the reaction of the GSH thiol group with dopaquinone, leading to the formation of a sulphhydryl–dopa conjugate and finally to a sulfur-containing pigment, pheomelanin instead of eumelanin [82–84]. Conversely, del Marmol and colleagues showed that the inhibition of GSH synthesis promoted tyrosinase activity and favoured eumelanogenesis in human melanoma cells [85]. Therefore, GSH, as an antioxidant with anti-melanogenic properties, has recently become the focus of attention in evaluating its suitability as a skin whitening agent.

Oral administration of GSH resulted in the lightening of skin colour in humans who were orally administered 500 mg of GSH per day for 4 weeks compared with the placebo group [86]. Similarly, Handog and colleagues reported a significant reduction in melanin index at both sun-exposed and sun-protected skin areas in all the subjects who received a GSH-containing lozenge (500 mg) daily for 8 weeks [87]. In 2018, a clinical trial (NCT04105504) in Indonesia also demonstrated that consumption of an oral GSH capsule (500 mg) once a day for 12 weeks reduced spot UV, spot polarization and skin tone measured at five different sites. Moreover, the oxidized form of glutathione (GSSG) was also found to have anti-melanogenic effects in humans. The skin melanin index was significantly lowered when 2% (w/w) GSSG lotion was applied on the face for 10 weeks compared with treatment with a placebo [88]. In addition, people who orally took GSSG (250 mg/day) for 12 weeks were found to have a lower melanin index and fewer UV spots at all sites, including the face and arm, compared with the placebo group [89]. These studies supported the potential of GSH to act as a skin whitening agent, however, the long-term efficacy and safety of GSH for skin lightening or the treatment of hyperpigmentation remains unclear.

## Glutathione-related enzyme and melanogenesis

Modulation of the glutathione system through its key enzymes, including cystine/glutamate antiporter (xCT), GCL and GR, has also been correlated with melanin formation.

The xCT provides intracellular cystine, which is rapidly reduced to cysteine for GSH production. GSH/Cysteine then switches eumelanin synthesis to pheomelanin by conjugating with dopaquinone to become intermediates of pheomelanin (Figure 2). xCT was reported as a major regulator of the production of pheomelanin in hair and melanocytes, with minimal or no effects on eumelanin [90]. Overexpressed xCT was responsible for the reduction in eumelanin formation in melanocytes and increased production of pheomelanin in the sheep wool, where brown/yellow patches were observed [91]. In addition, it was reported that up-regulation of xCT through the mTOR pathway enhanced pheomelanin production and inhibited eumelanin formation, which altered the overall melanin synthesis in mice [92]. These studies provided information regarding the role that xCT plays in melanogenesis and suggest that further exploration should be undertaken to investigate its role in skin pigmentation.

GCL is the first enzyme of the cellular GSH biosynthetic pathway and it is composed of a catalytic subunit (GCLC) and a modifier subunit (GCLM). The up-regulation of GCL was related to the inhibition of UVA-induced melanogenesis. A Thai herbal formula (AVS073 formula) was shown to have inhibitory effects on UVA-induced melanogenesis, and this was associated with a redox mechanism involving up-regulation of GSH biosynthesis caused by the increased mRNA expression of GCLC and GCLM in human melanoma cells [93]. Similarly, the anti-melanogenic effect of dietary phenolics was also related to their antioxidant properties. The anti-melanogenic effect of gallic acid correlated with increased GSH levels as well as with up-regulated GCL mRNA expression in both G361 and B16F10 melanoma cells [94]. Other dietary phenolics, including caffeic acid, quercetin and avobenzone, protect against UVA-induced melanogenesis through up-regulation of Nrf2 activity and consequently increased expression of its target genes and proteins including GCLC in B16F10 cells [95].

GR is the enzyme responsible for maintaining reduced GSH by catalysing the reduction of GSSG to GSH. It was reported that GR plays an important role in the regulation of the types of melanin pigments formed, where high GR activity was associated with pheomelanin formation [96,97]. This may be due to the supply of reduced GSH by GR leading to pheomelanin formation. It is proposed that melanogenic switching between eumelanin and pheomelanin production may be due to the covalent binding of dopaquinone to GR [98]. Also, melanogenic switching was found to be related to tyrosinase activity levels, where high tyrosinase activity produced an excess of dopaquinone resulting in the inactivation of GR and other enzymes essential for pheomelanogenesis [99]. These studies support the involvement of the GSH system in melanogenesis, and further investigation is needed to explore the possibility of utilizing, or targeting, glutathione system related enzymes in manipulating skin pigmentation.

A summary of the roles of the Trx and glutathione systems in melanogenesis is provided in Table 1.

## Current status and future directions

Oxidative stress induced by exogenous factors such as UVR contributes to the stimulation of melanogenesis. Antioxidants that function to reduce oxidative stress may demonstrate some efficacy in down-regulating excessive melanogenesis. GSH, one of the most abundant antioxidants in cells, has recently gained interest in its potential to act as a skin whitening agent. However, the long-term whitening effect of GSH remains unclear. We have reviewed the mechanism of the Trx and glutathione antioxidant systems, and the roles of these two antioxidant systems in melanogenesis, suggesting that antioxidants have the potential to act as depigmenting agents for the treatment of human hyperpigmentation disorders. Further investigation should focus on enhancing the stability and efficacy of topical or oral antioxidant products against hyperpigmentation for long-term use.

## Competing Interests

The authors declare that there are no competing interests associated with the manuscript.

## Funding

This work was supported by the Griffith University Postgraduate Research Scholarship (to Y.L.); and the Griffith University International Postgraduate Research Scholarship (to Y.L.).

## Author Contribution

Y.L. wrote the manuscript, prepared the figures and tables. K.F.T. and G.D.T. assisted with concept design discussions and edited the manuscript.



## Abbreviations

$\alpha$ -MSH,  $\alpha$ -melanocyte-stimulating hormone; ACTH, adrenocorticotrophic hormone; cAMP, cyclic adenosine monophosphate; CAT, catalase; CREB, cAMP response element-binding protein; DHI, 5,6-dihydroxyindole; DHICA, DHI-2- carboxylic acid; ERK, extracellular signal-regulated kinase; GCL, glutamate cysteine ligase; GCLC, GCL catalytic subunit; GCLM, GCL modifier subunit; GPx, glutathione peroxidase; GR, glutathione reductase; GSH, glutathione; GSS, glutathione synthetase; GSSG, glutathione disulphide; GST, glutathione S-transferase; H<sub>2</sub>O<sub>2</sub>, hydrogen peroxide; JNK, c-JUN N-terminal kinase; L-DOPA, L-3,4-dihydroxyphenylalanine; MAPK, mitogen-activated protein kinase; MC1R, melanocortin 1 receptor; MITF, melanogenesis-associated transcription factor; NADPH, nicotinamide adenine dinucleotide phosphate; Nrf2, nuclear factor erythroid 2-related factor 2; O<sub>2</sub><sup>•-</sup>, superoxide; OH•, hydroxyl radical; PKA, protein kinase A; POMC, pro-opiomelanocortin; ROS, reactive oxygen species; SCF, stem cell factor; SOD, superoxide dismutase; TCF-LEF, T-cell factor/lymphoid enhancer-binding factor; TRP-1, tyrosinase-related protein 1; TRP-2, dopachrome tautomerase; Trx, thioredoxin; TrxR, Trx reductase; TYR, tyrosinase; UVR, ultraviolet radiation; Wnt, wingless-related integration site; xCT, cystine/glutamate antiporter.

## References

- 1 Costin, G.E. and Hearing, V.J. (2007) Human skin pigmentation: melanocytes modulate skin color in response to stress. *FASEB J.* **21**, 976–994, <https://doi.org/10.1096/fj.06-6649rev>
- 2 Lin, J.Y. and Fisher, D.E. (2007) Melanocyte biology and skin pigmentation. *Nature* **445**, 843–850, <https://doi.org/10.1038/nature05660>
- 3 Tapia, C.V., Falconer, M., Tempio, F., Falcon, F., Lopez, M., Fuentes, M. et al. (2014) Melanocytes and melanin represent a first line of innate immunity against *Candida albicans*. *Med. Mycol.* **52**, 445–454, <https://doi.org/10.1093/mmy/uyu026>
- 4 Thody, A.J., Higgins, E.M., Wakamatsu, K., Ito, S., Burchill, S.A. and Marks, J.M. (1991) Pheomelanin as well as eumelanin is present in human epidermis. *J. Invest. Dermatol.* **97**, 340–344, <https://doi.org/10.1111/1523-1747.ep12480680>
- 5 Hearing, V.J. and Jimenez, M. (1987) Mammalian tyrosinase—the critical regulatory control point in melanocyte pigmentation. *Int. J. Biochem.* **19**, 1141–1147, [https://doi.org/10.1016/0020-711X\(87\)90095-4](https://doi.org/10.1016/0020-711X(87)90095-4)
- 6 Latifi, A., Ruiz, M. and Zhang, C.C. (2009) Oxidative stress in cyanobacteria. *FEMS Microbiol. Rev.* **33**, 258–278, <https://doi.org/10.1111/j.1574-6976.2008.00134.x>
- 7 Eller, M.S., Ostrom, K. and Gilchrest, B.A. (1996) DNA damage enhances melanogenesis. *Proc. Natl. Acad. Sci. U.S.A.* **93**, 1087–1092, <https://doi.org/10.1073/pnas.93.3.1087>
- 8 Tang, L., Li, J., Lin, X., Wu, W., Kang, K. and Fu, W. (2012) Oxidation levels differentially impact melanocytes: low versus high concentration of hydrogen peroxide promotes melanin synthesis and melanosome transfer. *Dermatology* **224**, 145–153, <https://doi.org/10.1159/000336777>
- 9 Tobin, D. and Thody, A.J. (1994) The superoxide anion may mediate short- but not long-term effects of ultraviolet radiation on melanogenesis. *Exp. Dermatol.* **3**, 99–105, <https://doi.org/10.1111/j.1600-0625.1994.tb00266.x>
- 10 Dumbuya, H., Hafez, S.Y. and Oancea, E. (2020) Cross talk between calcium and ROS regulate the UVA-induced melanin response in human melanocytes. *FASEB J.* **34**, 11605–11623, <https://doi.org/10.1096/fj.201903024R>
- 11 Holmgren, A. (1985) Thioredoxin. *Annu. Rev. Biochem.* **54**, 237–271, <https://doi.org/10.1146/annurev.bi.54.070185.001321>
- 12 Traverso, N., Ricciarelli, R., Nitti, M., Marengo, B., Furfaro, A.L., Pronzato, M.A. et al. (2013) Role of glutathione in cancer progression and chemoresistance. *Oxid. Med. Cell. Longev.* **2013**, 972913, <https://doi.org/10.1155/2013/972913>
- 13 Ito, S. and Wakamatsu, K. (2003) Quantitative analysis of eumelanin and pheomelanin in humans, mice, and other animals: a comparative review. *Pigment Cell Res.* **16**, 523–531, <https://doi.org/10.1034/j.1600-0749.2003.00072.x>
- 14 Fitzpatrick, T.B. (1988) The validity and practicality of sun-reactive skin types I through VI. *Arch. Dermatol.* **124**, 869–871, <https://doi.org/10.1001/archderm.1988.01670060015008>
- 15 Ito, S. and Wakamatsu, K. (2008) Chemistry of mixed melanogenesis—pivotal roles of dopaquinone. *Photochem. Photobiol.* **84**, 582–592, <https://doi.org/10.1111/j.1751-1097.2007.00238.x>
- 16 Solano, F. (2014) Melanins: skin pigments and much more—types, structural models, biological functions, and formation routes. *New J. Sci.* **2014**, 498276, <https://doi.org/10.1155/2014/498276>
- 17 Napolitano, A., Costantini, C., Crescenzi, O. and Protta, G. (1994) Characterization of 1,4-Benzothiazine intermediates in the oxidative conversion of 5-S-cysteinyl-dopa to pheomelanins. *Tetrahedron Lett.* **35**, 6365–6368, [https://doi.org/10.1016/S0040-4039\(00\)73434-4](https://doi.org/10.1016/S0040-4039(00)73434-4)
- 18 Di Donato, P. and Napolitano, A. (2003) 1,4-benzothiazines as key intermediates in the biosynthesis of red hair pigment pheomelanins. *Pigment Cell Res.* **16**, 532–539, <https://doi.org/10.1034/j.1600-0749.2003.00085.x>
- 19 Tsukamoto, K., Jackson, I.J., Urabe, K., Montague, P.M. and Hearing, V.J. (1992) A 2nd tyrosinase-related protein, Trp-2, is a melanogenic enzyme termed dopachrome tautomerase. *EMBO J.* **11**, 519–526, <https://doi.org/10.1002/j.1460-2075.1992.tb05082.x>
- 20 Plensdorf, S. and Martinez, J. (2009) Common pigmentation disorders. *Am. Fam. Physician* **79**, 109–116
- 21 Levy, C., Khaled, M. and Fisher, D.E. (2006) MITF: master regulator of melanocyte development and melanoma oncogene. *Trends Mol. Med.* **12**, 406–414, <https://doi.org/10.1016/j.molmed.2006.07.008>
- 22 Loercher, A.E., Tank, E.M., Delston, R.B. and Harbour, J.W. (2005) MITF links differentiation with cell cycle arrest in melanocytes by transcriptional activation of INK4A. *J. Cell Biol.* **168**, 35–40, <https://doi.org/10.1083/jcb.200410115>
- 23 Vance, K.W., Carreira, S., Brosch, G. and Goding, C.R. (2005) Tbx2 is overexpressed and plays an important role in maintaining proliferation and suppression of senescence in melanomas. *Cancer Res.* **65**, 2260–2268, <https://doi.org/10.1158/0008-5472.CAN-04-3045>
- 24 McGill, G.G., Haq, R., Nishimura, E.K. and Fisher, D.E. (2006) c-Met expression is regulated by Mitf in the melanocyte lineage. *J. Biol. Chem.* **281**, 10365–10373, <https://doi.org/10.1074/jbc.M513094200>

- 25 Otreba, M., Rok, J., Buszman, E. and Wrzesniok, D. (2012) [Regulation of melanogenesis: the role of cAMP and MITF]. *Postepy. Hig Med. Dosw. (Online)* **66**, 33–40
- 26 Hemesath, T.J., Price, E.R., Takemoto, C., Badalian, T. and Fisher, D.E. (1998) MAP kinase links the transcription factor Microphthalmia to c-Kit signalling in melanocytes. *Nature* **391**, 298–301, <https://doi.org/10.1038/34681>
- 27 Wellbrock, C. and Arozarena, I. (2015) Microphthalmia-associated transcription factor in melanoma development and MAP-kinase pathway targeted therapy. *Pigment Cell Melanoma Res.* **28**, 390–406, <https://doi.org/10.1111/pcmr.12370>
- 28 Kaur, A., Webster, M.R. and Weeraratna, A.T. (2016) In the Wnt-er of life: Wnt signalling in melanoma and ageing. *Br. J. Cancer* **115**, 1273–1279, <https://doi.org/10.1038/bjc.2016.332>
- 29 Gether, U. (2000) Uncovering molecular mechanisms involved in activation of G protein-coupled receptors. *Endocr. Rev.* **21**, 90–113, <https://doi.org/10.1210/edrv.21.1.0390>
- 30 Montero-Melendez, T. (2015) ACTH: The forgotten therapy. *Semin. Immunol.* **27**, 216–226, <https://doi.org/10.1016/j.smim.2015.02.003>
- 31 Thody, A.J. and Graham, A. (1998) Does alpha-MSH have a role in regulating skin pigmentation in humans? *Pigment Cell Res.* **11**, 265–274, <https://doi.org/10.1111/j.1600-0749.1998.tb00735.x>
- 32 Neves, S.R., Ram, P.T. and Iyengar, R. (2002) G protein pathways. *Science* **296**, 1636–1639, <https://doi.org/10.1126/science.1071550>
- 33 Aberle, H., Bauer, A., Stappert, J., Kispert, A. and Kemler, R. (1997) beta-catenin is a target for the ubiquitin-proteasome pathway. *EMBO J.* **16**, 3797–3804, <https://doi.org/10.1093/emboj/16.13.3797>
- 34 Moon, R.T., Brown, J.D. and Torres, M. (1997) WNTs modulate cell fate and behavior during vertebrate development. *Trends Genet.* **13**, 157–162, [https://doi.org/10.1016/S0168-9525\(97\)01093-7](https://doi.org/10.1016/S0168-9525(97)01093-7)
- 35 Behrens, J., von Kries, J.P., Kuhl, M., Bruhn, L., Wedlich, D., Grosschedl, R. et al. (1996) Functional interaction of beta-catenin with the transcription factor LEF-1. *Nature* **382**, 638–642, <https://doi.org/10.1038/382638a0>
- 36 Huber, O., Korn, R., McLaughlin, J., Ohsugi, M., Herrmann, B.G. and Kemler, R. (1996) Nuclear localization of beta-catenin by interaction with transcription factor LEF-1. *Mech. Dev.* **59**, 3–10, [https://doi.org/10.1016/0925-4773\(96\)00597-7](https://doi.org/10.1016/0925-4773(96)00597-7)
- 37 Bellei, B., Cardinali, G., Aspite, N., Izzo, E. and Picardo, M. (2008) Role of p38 mitogen-activated protein kinase in the alpha-melanocyte stimulating hormone(alpha-MSH)induced melanogenesis in B16 cells. *Pigment Cell Melanoma Res.* **21**, 301–301
- 38 Smalley, K. and Eisen, T. (2000) The involvement of p38 mitogen-activated protein kinase in the alpha-melanocyte stimulating hormone (alpha-MSH)-induced melanogenic and anti-proliferative effects in B16 murine melanoma cells. *FEBS Lett.* **476**, 198–202, [https://doi.org/10.1016/S0014-5793\(00\)01726-9](https://doi.org/10.1016/S0014-5793(00)01726-9)
- 39 Wu, M., Hemesath, T.J., Takemoto, C.M., Horstmann, M.A., Wells, A.G., Price, E.R. et al. (2000) c-Kit triggers dual phosphorylations, which couple activation and degradation of the essential melanocyte factor Mi. *Genes Dev.* **14**, 301–312
- 40 Kim, D.S., Hwang, E.S., Lee, J.E., Kim, S.Y., Kwon, S.B. and Park, K.C. (2003) Sphingosine-1-phosphate decreases melanin synthesis via sustained ERK activation and subsequent MITF degradation. *J. Cell Sci.* **116**, 1699–1706, <https://doi.org/10.1242/jcs.00366>
- 41 Fu, Y.T., Lee, C.W., Ko, H.H. and Yen, F.L. (2014) Extracts of *Artocarpus communis* decrease alpha-melanocyte stimulating hormone-induced melanogenesis through activation of ERK and JNK signaling pathways. *Scientific World J.* **2014**, 724314, <https://doi.org/10.1155/2014/724314>
- 42 Sato, T. and Kawada, A. (1972) Mitotic activity of hairless mouse epidermal melanocytes: its role in the increase of melanocytes during ultraviolet radiation. *J. Invest. Dermatol.* **58**, 392–395, <https://doi.org/10.1111/1523-1747.ep12540628>
- 43 Stiermer, U., Rosdahl, I., Augustsson, A. and Kagedal, B. (1989) UVB irradiation induces melanocyte increase in both exposed and shielded human skin. *J. Invest. Dermatol.* **92**, 561–564, <https://doi.org/10.1111/1523-1747.ep12709572>
- 44 Cardinali, G., Bolasco, G., Aspite, N., Lucania, G., Lotti, L.V., Torrisi, M.R. et al. (2008) Melanosome transfer promoted by keratinocyte growth factor in light and dark skin-derived keratinocytes. *J. Invest. Dermatol.* **128**, 558–567, <https://doi.org/10.1038/sj.jid.5701063>
- 45 Chakraborty, A., Slominski, A., Ermak, G., Hwang, J. and Pawelek, J. (1995) Ultraviolet B and melanocyte-stimulating hormone (MSH) stimulate mRNA production for alpha MSH receptors and proopiomelanocortin-derived peptides in mouse melanoma cells and transformed keratinocytes. *J. Invest. Dermatol.* **105**, 655–659, <https://doi.org/10.1111/1523-1747.ep12324134>
- 46 Chakraborty, A.K., Funasaka, Y., Slominski, A., Ermak, G., Hwang, J., Pawelek, J.M. et al. (1996) Production and release of proopiomelanocortin (POMC) derived peptides by human melanocytes and keratinocytes in culture: regulation by ultraviolet B. *Biochim. Biophys. Acta* **1313**, 130–138, [https://doi.org/10.1016/0167-4889\(96\)00063-8](https://doi.org/10.1016/0167-4889(96)00063-8)
- 47 Miyamura, Y., Coelho, S.G., Wolber, R., Miller, S.A., Wakamatsu, K., Zmudzka, B.Z. et al. (2007) Regulation of human skin pigmentation and responses to ultraviolet radiation. *Pigment Cell Res.* **20**, 2–13, <https://doi.org/10.1111/j.1600-0749.2006.00358.x>
- 48 Nordberg, J. and Arner, E.S. (2001) Reactive oxygen species, antioxidants, and the mammalian thioredoxin system. *Free Radic. Biol. Med.* **31**, 1287–1312, [https://doi.org/10.1016/S0891-5849\(01\)00724-9](https://doi.org/10.1016/S0891-5849(01)00724-9)
- 49 Liebel, F., Kaur, S., Ruvolo, E., Kollias, N. and Southall, M.D. (2012) Irradiation of skin with visible light induces reactive oxygen species and matrix-degrading enzymes. *J. Invest. Dermatol.* **132**, 1901–1907, <https://doi.org/10.1038/jid.2011.476>
- 50 Guachalla, L.M. and Rudolph, K.L. (2010) ROS induced DNA damage and checkpoint responses: influences on aging? *Cell Cycle* **9**, 4058–4060, <https://doi.org/10.4161/cc.9.20.13577>
- 51 Xiang, Q.S., Wang, Y.T., Wu, W.Q., Meng, X., Qiao, Y., Xu, L. et al. (2013) Carnosic acid protects against ROS/RNS-induced protein damage and upregulates HO-1 expression in RAW264.7 macrophages. *J. Funct. Foods* **5**, 362–369, <https://doi.org/10.1016/j.jff.2012.11.007>
- 52 Ayala, A., Munoz, M.F. and Arguelles, S. (2014) Lipid peroxidation: production, metabolism, and signaling mechanisms of malondialdehyde and 4-hydroxy-2-nonenal. *Oxid. Med. Cell. Longev.* **2014**, 360438, <https://doi.org/10.1155/2014/360438>
- 53 Koga, S., Nakano, M. and Tero-Kubota, S. (1992) Generation of superoxide during the enzymatic action of tyrosinase. *Arch. Biochem. Biophys.* **292**, 570–575, [https://doi.org/10.1016/0003-9861\(92\)90032-R](https://doi.org/10.1016/0003-9861(92)90032-R)

- 54 Nappi, A.J. and Vass, E. (1996) Hydrogen peroxide generation associated with the oxidations of the eumelanin precursors 5,6-dihydroxyindole and 5,6-dihydroxyindole-2-carboxylic acid. *Melanoma Res.* **6**, 341–349, <https://doi.org/10.1097/00008390-199610000-00001>
- 55 Smit, N.P., van Nieuwpoort, F.A., Marrot, L., Out, C., Poorthuis, B., van Pelt, H. et al. (2008) Increased melanogenesis is a risk factor for oxidative DNA damage—study on cultured melanocytes and atypical nevus cells. *Photochem. Photobiol.* **84**, 550–555, <https://doi.org/10.1111/j.1751-1097.2007.00242.x>
- 56 Bouayed, J. and Bohn, T. (2010) Exogenous antioxidants—Double-edged swords in cellular redox state: health beneficial effects at physiologic doses versus deleterious effects at high doses. *Oxid. Med. Cell. Longev.* **3**, 228–237, <https://doi.org/10.4161/oxim.3.4.12858>
- 57 Maresca, V., Flori, E., Briganti, S., Mastrofrancesco, A., Fabbri, C., Mileo, A.M. et al. (2008) Correlation between melanogenic and catalase activity in vitro human melanocytes: a synergic strategy against oxidative stress. *Pigment Cell Melanoma Res.* **21**, 200–205, <https://doi.org/10.1111/j.1755-148X.2007.00432.x>
- 58 Ighodaro, O.M. and Akinloye, O.A. (2018) First line defence antioxidants-superoxide dismutase (SOD), catalase (CAT) and glutathione peroxidase (GPX): their fundamental role in the entire antioxidant defence grid. *Alex J. Med.* **54**, 287–293, <https://doi.org/10.1016/j.ajme.2017.09.001>
- 59 Delijewski, M., Wrzesniok, D., Otreba, M., Beberok, A., Rok, J. and Buszman, E. (2014) Nicotine impact on melanogenesis and antioxidant defense system in HEMn-DP melanocytes. *Mol. Cell. Biochem.* **395**, 109–116, <https://doi.org/10.1007/s11010-014-2116-1>
- 60 Kao, Y.Y., Chuang, T.F., Chao, S.H., Yang, J.H., Lin, Y.C. and Huang, H.Y. (2013) Evaluation of the antioxidant and melanogenesis inhibitory properties of praparatum mungo (lu-do huang). *J. Tradit. Complement. Med.* **3**, 163–170, <https://doi.org/10.4103/2225-4110.113443>
- 61 Peng, H.Y., Lin, C.C., Wang, H.Y., Shih, Y. and Chou, S.T. (2014) The melanogenesis alteration effects of Achillea millefolium L. essential oil and linalyl acetate: involvement of oxidative stress and the JNK and ERK signaling pathways in melanoma cells. *PLoS ONE* **9**, e95186, <https://doi.org/10.1371/journal.pone.0095186>
- 62 Hayakawa, R., Ueda, H., Nozaki, T., Izawa, Y., Yokotake, J., Yazaki, K. et al. (1981) Effects of combination treatment with vitamins E and C on chloasma and pigmented contact dermatitis. A double blind controlled clinical trial. *Acta Vitaminol. Enzymol.* **3**, 31–38
- 63 Quevedo, Jr, W.C., Holstein, T.J., Dyckman, J., McDonald, C.J. and Isaacson, E.L. (2000) Inhibition of UVR-induced tanning and immunosuppression by topical applications of vitamins C and E to the skin of hairless (hr/hr) mice. *Pigment Cell Res.* **13**, 89–98, <https://doi.org/10.1034/j.1600-0749.2000.130207.x>
- 64 Holmgren, A. (1995) Thioredoxin structure and mechanism: conformational changes on oxidation of the active-site sulfhydryls to a disulfide. *Structure* **3**, 239–243, [https://doi.org/10.1016/S0969-2126\(01\)00153-8](https://doi.org/10.1016/S0969-2126(01)00153-8)
- 65 Lu, J. and Holmgren, A. (2014) The thioredoxin superfamily in oxidative protein folding. *Antioxid. Redox Signal.* **21**, 457–470, <https://doi.org/10.1089/ars.2014.5849>
- 66 Chang, W.H., Reddy, S.P., Di, Y.P., Yoneda, K., Harper, R. and Wu, R. (2002) Regulation of thioredoxin gene expression by vitamin A in human airway epithelial cells. *Am. J. Resp. Cell Mol.* **26**, 627–635, <https://doi.org/10.1165/ajrcmb.26.5.4276>
- 67 Soderberg, O., Christiansen, I., Nilsson, G., Carlsson, M. and Nilsson, K. (1997) Interleukin-15 + thioredoxin induce DNA synthesis in B-chronic lymphocytic leukemia cells but not in normal B cells. *Leukemia* **11**, 1298–1304, <https://doi.org/10.1038/sj.leu.2400728>
- 68 Bai, J., Nakamura, H., Kwon, Y.W., Hattori, I., Yamaguchi, Y., Kim, Y.C. et al. (2003) Critical roles of thioredoxin in nerve growth factor-mediated signal transduction and neurite outgrowth in PC12 cells. *J. Neurosci.* **23**, 503–509, <https://doi.org/10.1523/JNEUROSCI.23-02-00503.2003>
- 69 Liu, H., Nishitoh, H., Ichijo, H. and Kyriakis, J.M. (2000) Activation of apoptosis signal-regulating kinase 1 (ASK1) by tumor necrosis factor receptor-associated factor 2 requires prior dissociation of the ASK1 inhibitor thioredoxin. *Mol. Cell. Biol.* **20**, 2198–2208, <https://doi.org/10.1128/MCB.20.6.2198-2208.2000>
- 70 Powis, G. and Montfort, W.R. (2001) Properties and biological activities of thioredoxins. *Annu. Rev. Pharmacol.* **41**, 261–295, <https://doi.org/10.1146/annurev.pharmtox.41.1.261>
- 71 Lundstrom, J. and Holmgren, A. (1990) Protein disulfide-isomerase is a substrate for thioredoxin reductase and has thioredoxin-like activity. *J. Biol. Chem.* **265**, 9114–9120, [https://doi.org/10.1016/S0021-9258\(19\)38819-2](https://doi.org/10.1016/S0021-9258(19)38819-2)
- 72 Wood, J.M. and Schallreuter, K.U. (1988) Reduced thioredoxin inhibits melanin biosynthesis - evidence for the formation of a stable bis-cysteinate complex with tyrosinase. *Inorg. Chim. Bioinorg.* **151**, 7–7, [https://doi.org/10.1016/S0020-1693\(00\)83474-X](https://doi.org/10.1016/S0020-1693(00)83474-X)
- 73 Schallreuter, K.U., Lemke, K.R., Hill, H.Z. and Wood, J.M. (1994) Thioredoxin reductase induction coincides with melanin biosynthesis in brown and black guinea pigs and in murine melanoma cells. *J. Invest. Dermatol.* **103**, 820–824, <https://doi.org/10.1111/1523-1747.ep12413557>
- 74 Schallreuter, K.U. and Wood, J.M. (2001) Thioredoxin reductase - its role in epidermal redox status. *J. Photochem. Photobiol. B.* **64**, 179–184, [https://doi.org/10.1016/S1011-1344\(01\)00235-4](https://doi.org/10.1016/S1011-1344(01)00235-4)
- 75 Schallreuter, K.U., Hordinsky, M.K. and Wood, J.M. (1987) Thioredoxin reductase. Role in free radical reduction in different hypopigmentation disorders. *Arch. Dermatol.* **123**, 615–619, <https://doi.org/10.1001/archderm.1987.01660290083021>
- 76 Cassidy, P., Kline, C., Carpenter, E., Laws, M., Moos, P., Indra, A. et al. (2018) Thioredoxin reductase 1 knockdown disrupts pigment synthesis in melanocytes. *Free Radic. Biol. Med.* **128**, S64–S64, <https://doi.org/10.1016/j.freeradbiomed.2018.10.131>
- 77 Lu, S.C. (2013) Glutathione synthesis. *Biochim. Biophys. Acta* **1830**, 3143–3153, <https://doi.org/10.1016/j.bbagen.2012.09.008>
- 78 Foyer, C.H. and Halliwell, B. (1976) The presence of glutathione and glutathione reductase in chloroplasts: A proposed role in ascorbic acid metabolism. *Planta* **133**, 21–25, <https://doi.org/10.1007/BF00386001>
- 79 Chakravarthi, S., Jessop, C.E. and Bulleid, N.J. (2006) The role of glutathione in disulphide bond formation and endoplasmic-reticulum-generated oxidative stress. *EMBO Rep.* **7**, 271–275, <https://doi.org/10.1038/sj.embor.7400645>
- 80 Gallogly, M.M., Starke, D.W., Leonberg, A.K., Ospina, S.M. and Mielay, J.J. (2008) Kinetic and mechanistic characterization and versatile catalytic properties of mammalian glutaredoxin 2: implications for intracellular roles. *Biochemistry* **47**, 11144–11157, <https://doi.org/10.1021/bi800966v>
- 81 Gallogly, M.M., Starke, D.W. and Mielay, J.J. (2009) Mechanistic and kinetic details of catalysis of thiol-disulfide exchange by glutaredoxins and potential mechanisms of regulation. *Antioxid. Redox Signal.* **11**, 1059–1081, <https://doi.org/10.1089/ars.2008.2291>

- 82 Jara, J.R., Aroca, P., Solano, F., Martinez, J.H. and Lozano, J.A. (1988) The role of sulfhydryl compounds in mammalian melanogenesis - the effect of cysteine and glutathione upon tyrosinase and the intermediates of the pathway. *Biochim. Biophys. Acta* **967**, 296–303, [https://doi.org/10.1016/0304-4165\(88\)90023-2](https://doi.org/10.1016/0304-4165(88)90023-2)
- 83 Rorsman, H., Albertsson, E., Edholm, L.E., Hansson, C., Ogren, L. and Rosengren, E. (1988) Thiols in the melanocyte. *Pigment Cell Res.* **1**, 54–60, <https://doi.org/10.1111/j.1600-0749.1988.tb00795.x>
- 84 Motohashi, N., Nishikawa, H. and Mori, I. (1991) Inhibitory effects of sulfur-compounds on melanin formation reaction by tyrosinase. *Chem. Pharm. Bull.* **39**, 142–145, <https://doi.org/10.1248/cpb.39.142>
- 85 del Marmol, V., Solano, F., Sels, A., Huez, G., Libert, A., Lejeune, F. et al. (1993) Glutathione depletion increases tyrosinase activity in human melanoma cells. *J. Invest. Dermatol.* **101**, 871–874, <https://doi.org/10.1111/1523-1747.ep12371709>
- 86 Arjinpathana, N. and Asawanonda, P. (2012) Glutathione as an oral whitening agent: a randomized, double-blind, placebo-controlled study. *J. Dermatol. Treat.* **23**, 97–102, <https://doi.org/10.3109/09546631003801619>
- 87 Handog, E.B., Datuin, M.S. and Singzon, I.A. (2016) An open-label, single-arm trial of the safety and efficacy of a novel preparation of glutathione as a skin-lightening agent in Filipino women. *Int. J. Dermatol.* **55**, 153–157, <https://doi.org/10.1111/ijd.12999>
- 88 Watanabe, F., Hashizume, E., Chan, G.P. and Kamimura, A. (2014) Skin-whitening and skin-condition-improving effects of topical oxidized glutathione: a double-blind and placebo-controlled clinical trial in healthy women. *Clin. Cosmet. Investig. Dermatol.* **7**, 267–274, <https://doi.org/10.2147/CCID.S68424>
- 89 Weschawalit, S., Thongthip, S., Phutrakool, P. and Asawanonda, P. (2017) Glutathione and its antiaging and antimelanogenic effects. *Clin. Cosmet. Investig. Dermatol.* **10**, 147–153, <https://doi.org/10.2147/CCID.S128339>
- 90 Chintala, S., Li, W., Lamoreux, M.L., Ito, S., Wakamatsu, K., Sviderskaya, E.V. et al. (2005) Slc7a11 gene controls production of pheomelanin pigment and proliferation of cultured cells. *Proc. Natl. Acad. Sci. U.S.A.* **102**, 10964–10969, <https://doi.org/10.1073/pnas.0502856102>
- 91 He, X., Li, H., Zhou, Z., Zhao, Z. and Li, W. (2012) Production of brown/yellow patches in the SLC7A11 transgenic sheep via testicular injection of transgene. *J. Genet. Genomics* **39**, 281–285, <https://doi.org/10.1016/j.jgg.2012.04.005>
- 92 Li, C., Chen, H., Lan, Z., He, S., Chen, R., Wang, F. et al. (2019) mTOR-dependent upregulation of xCT blocks melanin synthesis and promotes tumorigenesis. *Cell Death Differ.* **26**, 2015–2028, <https://doi.org/10.1038/s41418-019-0274-0>
- 93 Panich, U., Pluemsamran, T., Tangsupa-a-nan, V., Wattanarangsarn, J., Phadungrakwittaya, R., Akarasereenont, P. et al. (2013) Protective effect of AVS073, a polyherbal formula, against UVA-induced melanogenesis through a redox mechanism involving glutathione-related antioxidant defense. *BMC Complement. Altern. Med.* **13**, 159, <https://doi.org/10.1186/1472-6882-13-159>
- 94 Panich, U., Onkokoosong, T., Limsaengurai, S., Akarasereenont, P. and Wongkajornsilp, A. (2012) UVA-induced melanogenesis and modulation of glutathione redox system in different melanoma cell lines: the protective effect of gallic acid. *J. Photochem. Photobiol. B.* **108**, 16–22, <https://doi.org/10.1016/j.jphotobiol.2011.12.004>
- 95 Chairprasongsuk, A., Onkokoosong, T., Pluemsamran, T., Limsaengurai, S. and Panich, U. (2016) Photoprotection by dietary phenolics against melanogenesis induced by UVA through Nrf2-dependent antioxidant responses. *Redox Biol.* **8**, 79–90, <https://doi.org/10.1016/j.redox.2015.12.006>
- 96 Benedetto, J.P., Ortonne, J.P., Voulot, C., Khatchadourian, C., Prota, G. and Thivolet, J. (1981) Role of thiol compounds in mammalian melanin pigmentation: part I. Reduced and oxidized glutathione. *J. Invest. Dermatol.* **77**, 402–405, <https://doi.org/10.1111/1523-1747.ep12494592>
- 97 Benedetto, J.P., Ortonne, J.P., Voulot, C., Khatchadourian, C., Prota, G. and Thivolet, J. (1982) Role of thiol compounds in mammalian melanin pigmentation. II. Glutathione and related enzymatic activities. *J. Invest. Dermatol.* **79**, 422–424, <https://doi.org/10.1111/1523-1747.ep12530631>
- 98 Ito, S. (1993) High-performance liquid-chromatography (Hplc) analysis of Eumelanin and Pheomelanin in melanogenesis control. *J. Invest. Dermatol.* **100**, S166–S171, <https://doi.org/10.1038/jid.1993.8>
- 99 Oyehaug, L., Plahte, E., Vage, D.I. and Omholt, S.W. (2002) The regulatory basis of melanogenic switching. *J. Theor. Biol.* **215**, 449–468, <https://doi.org/10.1006/jtbi.2001.2521>
